# Supplementary material for: Growth mechanism of vertically aligned SnSe nanosheets via physical vapour deposition
Source: Royal Society of Chemistry journal article supplement (doi:10.1039/c4ce00213j), 2014-01-01
Supplement: c4ce00213j1.pdf [file c4ce00213j1.pdf]

## **Supplementary Information**

### **Growth Mechanism of Vertically Aligned SnSe Nanosheets via Physical Vapour Deposition**

Xing-Hua Ma,<sup>‡</sup> Ki-Hyun Cho<sup>‡</sup> and Yun-Mo Sung<sup>\*</sup>

Department of Materials Science and Engineering, Korea University, Seoul 136-713, South Korea

E-mail: ymsung@korea.ac.kr

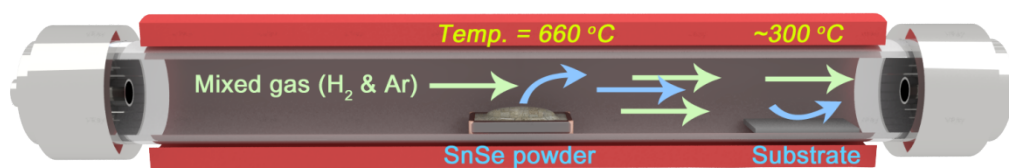

**Scheme S1.** A schematic illustration of the experimental setup using in the experiment

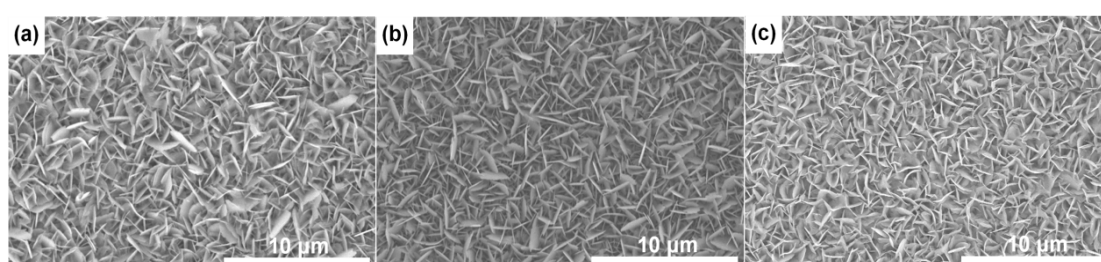

**Fig. S1.** FESEM images of SnSe nanosheets grown on (a) Si, (b) SiO<sub>2</sub> and (c) FTO glass.
